# Supplementary material for: Silencing of Phytopathogen Communication by the Halotolerant PGPR Staphylococcus Equorum Strain EN21
Source: PubMed Central journal article supplement (PMC7022284; doi:10.3390/microorganisms8010042), 2019-12-24
Supplement: microorganisms-08-00042-s001.pdf [file microorganisms-08-00042-s001.pdf]

# **Silencing of phytopathogen communication by the halotolerant PGPR *Staphylococcus equorum* strain EN21**

**Clara Vega<sup>1,2</sup>, Miguel Rodríguez<sup>1,2</sup>, Inmaculada Llamas<sup>1,2\*</sup>, Victoria Béjar<sup>1,2</sup>,  
Inmaculada Sampedro<sup>1,2\*</sup>**

<sup>1</sup>Department of Microbiology, Faculty of Pharmacy, University of Granada, 18071 Granada, Spain.

<sup>2</sup>Institute of Biotechnology, Biomedical Research Center (CIBM), University of Granada, 18100 Granada, Spain.

**\*Corresponding authors:**

Inmaculada Sampedro ([isampedro@ugr.es](mailto:isampedro@ugr.es)) and Inmaculada Llamas ([illamas@ugr.es](mailto:illamas@ugr.es))

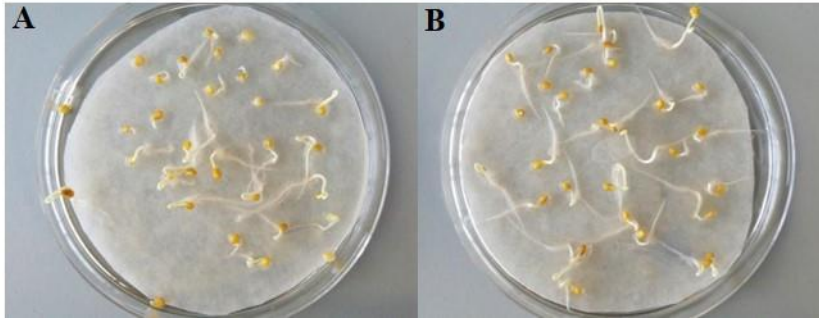

**Figure S1.** Effect of tomato seed biopriming with *S. equorum* strain EN21. A) Control seeds. B) EN21 bacterized seeds.

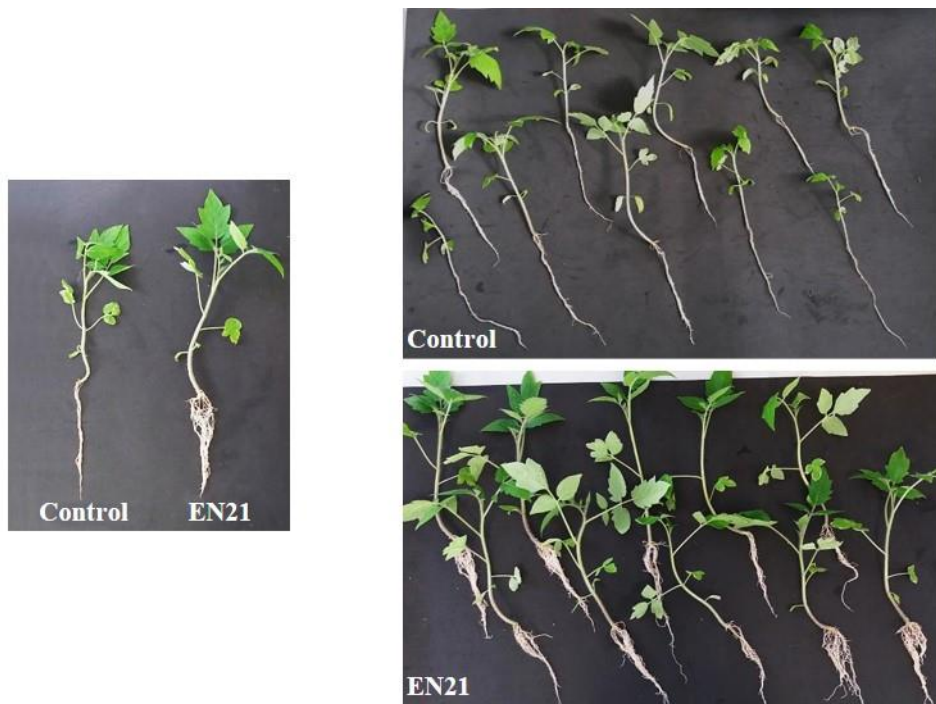

**Figure S2.** Effect of biopriming + inoculation treatment with EN21 strain on tomato plants.

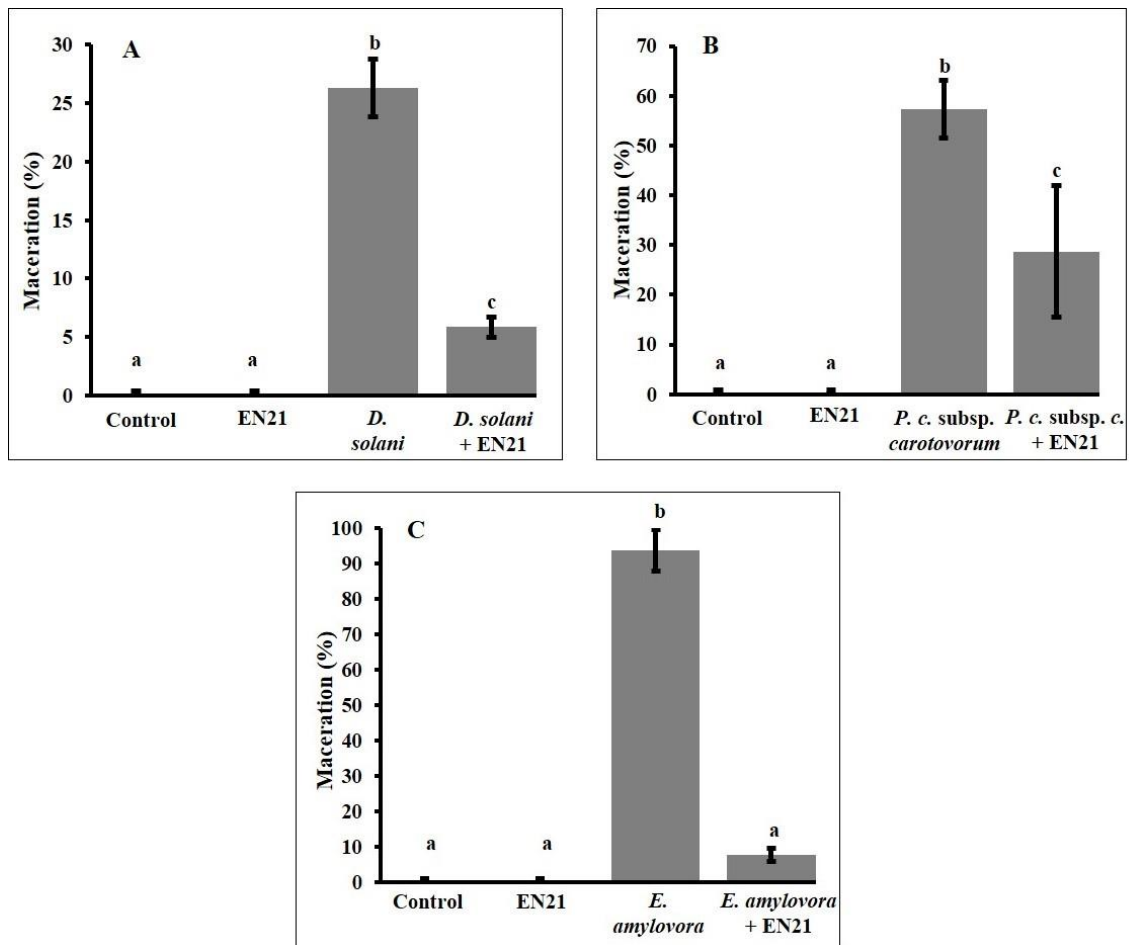

**Figure S3.** Maceration (%) of potato tubers (A), carrots (B) and pears (C) in *D. solani*, *P. carotovorum* subsp. *carotovorum* and *E. amylovora* mono-cultures, respectively, and in co-culture with EN21. Error bars represent the standard deviation. Letters indicate statistically significant differences ( $p \leq 0.05$ ).

**Table S1.** Effect of EN21 on enzymatic activities of phytopathogens in co-cultures. (-) no activity, (+) weak activity, (++) moderate activity, (+++) strong activity. ND = not determined.

| Phenotype              | <i>S. equorum</i> | <i>A. fabrum</i> |       | <i>D. solani</i> |       | <i>E. amylovora</i> |       | <i>P. atrosepticum</i> |       | <i>P. c. subsp. carotovorum</i> |       | <i>P. s. pv. syringae</i> |       | <i>P. s. pv. tomato</i> |       |
|------------------------|-------------------|------------------|-------|------------------|-------|---------------------|-------|------------------------|-------|---------------------------------|-------|---------------------------|-------|-------------------------|-------|
|                        | EN21              | Control          | +EN21 | Control          | +EN21 | Control             | +EN21 | Control                | +EN21 | Control                         | +EN21 | Control                   | +EN21 | Control                 | +EN21 |
| <b>Amylase</b>         | -                 | -                | ND    | +                | +     | -                   | ND    | -                      | ND    | -                               | ND    | ++                        | -     | +++                     | +     |
| <b>Caseinase</b>       | -                 | +                | +     | ++               | +     | -                   | ND    | -                      | ND    | -                               | ND    | -                         | ND    | +                       | +     |
| <b>Cellulase</b>       | +                 | -                | ND    | -                | ND    | -                   | ND    | -                      | ND    | -                               | ND    | +                         | +     | -                       | ND    |
| <b>Chitinase</b>       | -                 | -                | ND    | -                | ND    | -                   | ND    | -                      | ND    | -                               | ND    | ++                        | +     | -                       | ND    |
| <b>DNase</b>           | -                 | ++               | ++    | ++               | +     | -                   | ND    | +++                    | ++    | ++                              | ++    | ++                        | ++    | +                       | +     |
| <b>Phosphatase</b>     | ++                | -                | ND    | +++              | ++    | ++                  | ++    | -                      | ND    | ++                              | ++    | ++                        | ++    | +++                     | ++    |
| <b>Gelatinase</b>      | -                 | +                | +     | +                | +     | -                   | ND    | -                      | ND    | +                               | +     | +                         | -     | -                       | ND    |
| <b>Lecithinase</b>     | -                 | -                | ND    | +++              | ++    | -                   | ND    | -                      | ND    | ++                              | +     | -                         | ND    | +                       | +     |
| <b>Lipase Tween 20</b> | ++                | -                | ND    | ++               | ++    | ++                  | ++    | +++                    | ++    | +++                             | ++    | ++                        | ++    | ++                      | ++    |
| <b>Lipase Tween 80</b> | -                 | -                | ND    | +                | +     | +                   | +     | +                      | +     | +                               | +     | -                         | ND    | +                       | +     |
| <b>Surfactants</b>     | +                 | +++              | +     | +                | +     | -                   | ND    | -                      | ND    | -                               | ND    | +                         | +     | +                       | +     |
